# Supplementary material for: Radioecological and geochemical peculiarities of cryoconite on Novaya Zemlya glaciers
Source: PubMed Central journal article supplement (PMC8630109; doi:10.1038/s41598-021-02601-8), 2021-11-29
Supplement: 41598_2021_2601_MOESM1_ESM.pdf [file 41598_2021_2601_MOESM1_ESM.pdf]

# Supplementary Material to “Radioecological and geochemical peculiarities of cryoconite on Novaya Zemlya glaciers”

**Alexey Miroshnikov<sup>1\*</sup>, Mikhail Flint<sup>2</sup>, Enver Asadulin<sup>1</sup>, Ramiz Aliev<sup>3,4</sup>, Andrei Shiryayev<sup>5,1</sup>, Arseniy Kudikov<sup>6</sup>, and Vladimir Khvostikov<sup>7</sup>**

<sup>1</sup> Institute of Geology of Ore Deposits, Petrography, Mineralogy, and Geochemistry RAS, Moscow, 119017, Russia

<sup>2</sup> Shirshov Institute of Oceanology RAS, Moscow, 117997, Russia

<sup>3</sup> National Research Center “Kurchatov Institute”, Moscow, 123182, Russia

<sup>4</sup> Chemistry Department, Lomonosov Moscow State University, Leninskie Gory, 1, Moscow, 119991, Russia

<sup>5</sup> Frumkin Institute of Physical chemistry and Electrochemistry RAS, Moscow, 119071, Russia

<sup>6</sup> Institute of Geography RAS, Moscow, 119017, Russia

<sup>7</sup> Institute of Microelectronics Technology Problems and High-Purity Materials RAS, Chernogolovka, Moscow region, 142432, Russia

\* [alexey-miroshnikov@yandex.ru](mailto:alexey-miroshnikov@yandex.ru)

**Table S1.** Coordinates and elevations of sampling points.

| <b>Sample</b> | <b>Latitude (°N)</b> | <b>Longitude (°E)</b> | <b>Altitude a.s.l. (m)</b> |
|---------------|----------------------|-----------------------|----------------------------|
| 1701          | 75.7493              | 63.5878               | 132.8                      |
| 1702          | 75.7507              | 63.5857               | 149.0                      |
| 1703          | 75.7511              | 63.5858               | 153.0                      |
| 1704          | 75.7518              | 63.5860               | 159.9                      |
| 1705          | 75.7524              | 63.5852               | 165.0                      |
| 1706          | 75.7522              | 63.5850               | 166.3                      |
| 1707          | 75.7534              | 63.5904               | 175.1                      |
| 1708          | 75.7532              | 63.5910               | 176.2                      |
| 1709          | 75.7547              | 63.5897               | 188.6                      |
| 1710          | 75.7583              | 63.5997               | 218.9                      |
| 1711          | 75.7566              | 63.6051               | 200.8                      |
| 1712          | 75.7555              | 63.6083               | 191.8                      |
| 1713          | 75.7529              | 63.6018               | 171.7                      |
| 1714          | 75.7518              | 63.5951               | 159.0                      |
| 1801          | 75.7530              | 63.5764               | 181.0                      |
| 1802          | 75.7571              | 63.5716               | 216.3                      |
| 1803          | 75.7622              | 63.5666               | 242.8                      |
| 1804          | 75.7675              | 63.5523               | 273.0                      |
| 1805          | 75.7677              | 63.5534               | 274.9                      |
| 1806          | 75.7735              | 63.5416               | 324.0                      |
| 1807          | 75.7744              | 63.5406               | 330.4                      |
| 1808          | 75.7766              | 63.5331               | 339.5                      |
| 1809          | 75.7781              | 63.5281               | 342.4                      |
| 1810          | 75.7782              | 63.5266               | 342.8                      |
| 1811          | 75.7835              | 63.5195               | 357.2                      |
| 1812          | 75.7840              | 63.5198               | 358.0                      |
| 1813          | 75.7865              | 63.5307               | 363.8                      |
| 1814          | 75.7871              | 63.5306               | 365.3                      |

**Table S2.** Activity of anthropogenic and natural radionuclides in cryoconite samples from Nalli Glacier (Bq kg<sup>-1</sup> d.m.).

| Sample | <sup>137</sup> Cs | <sup>241</sup> Am | <sup>207</sup> Bi | <sup>210</sup> Pb (total) | <sup>226</sup> Ra | <sup>7</sup> Be |
|--------|-------------------|-------------------|-------------------|---------------------------|-------------------|-----------------|
| 1701   | 58 (±2)           | <LD               | < LD              | 1283 (±31)                | 34(±3)            | 44 (±13)        |
| 1702   | 208 (±5)          | < LD              | < LD              | 5823 (±155)               | 31(±4)            | 1264 (±45)      |
| 1703   | 270 (±4)          | 1.8 (±0.9)        | < LD              | 2566 (±46)                | 31(±2)            | 121 (±20)       |
| 1704   | 275 (±5)          | 1.8 (±0.9)        | < LD              | 2449 (±42)                | 37(±3)            | 1199 (±36)      |
| 1705   | 313 (±5)          | < LD              | < LD              | 2951 (±71)                | 33(±3)            | 553 (±37)       |
| 1706   | 207 (±2)          | 1.8 (±0.8)        | < LD              | 2419 (±46)                | 29(±1)            | 469 (±16)       |
| 1707   | 270 (±3)          | 1.6 (±0.9)        | < LD              | 2573 (±41)                | 33(±2)            | 82 (±19)        |
| 1708   | 215 (±4)          | 1.4 (±0.6)        | < LD              | 2261 (±43)                | 30(±2)            | 420 (±32)       |
| 1709   | 436 (±5)          | 2.8 (±0.7)        | < LD              | 2408 (±46)                | 28(±2)            | 354 (±20)       |
| 1710   | 2076 (±20)        | 9.1 (±2.7)        | 2.1 (±0.7)        | 5134 (±117)               | 22(±4)            | 1143 (±52)      |
| 1711   | 210 (±2)          | 1.3 (±0.8)        | < LD              | 2300 (±37)                | 31(±1)            | 89 (±11)        |
| 1712   | 140 (±2)          | 1.5 (±0.7)        | < LD              | 1381 (±28)                | 28(±1)            | 122 (±11)       |
| 1713   | 75 (±2)           | < LD              | < LD              | 1454 (±26)                | 31(±1)            | 73 (±9)         |
| 1714   | 203 (±2)          | 2.1 (±0.9)        | < LD              | 1863 (±39)                | 33(±1)            | 38 (±10)        |
| 1801   | 244 (±4)          | < LD              | < LD              | 2758 (±46)                | 32(±2)            | 94 (±13)        |
| 1802   | 1046 (±15)        | 4.4 (±1.3)        | < LD              | 6004 (±160)               | 29(±4)            | 2418 (±76)      |
| 1803   | 2667 (±5)         | 12.5 (±0.8)       | 2.2 (±0.4)        | 8873 (±212)               | 20(±2)            | 1000 (±30)      |
| 1804   | 2991 (±27)        | 16.5 (±1.1)       | 2.6 (±0.6)        | 9748 (±274)               | 20(±2)            | 1076 (±53)      |
| 1805   | 3215 (±30)        | 18.8 (±1.1)       | 2.9 (±0.7)        | 9716 (±290)               | 21(±4)            | 957 (±43)       |
| 1806   | 4659 (±34)        | 28.1 (±1.0)       | 3.8 (±0.5)        | 9530 (±304)               | 22(±2)            | 474 (±78)       |
| 1807   | 3745 (±32)        | 22.0 (±1.3)       | 3.0 (±0.7)        | 6488 (±105)               | 20(±2)            | 224 (±46)       |
| 1808   | 4420 (±40)        | 26.7 (±1.5)       | 4.4 (±0.8)        | 6775 (±154)               | 17(±3)            | 414 (±48)       |
| 1809   | 3650 (±29)        | 23.0 (±2.2)       | 3.8 (±0.8)        | 7232 (±86)                | 17(±3)            | 356 (±53)       |
| 1810   | 3531 (±29)        | 20.7 (±1.2)       | 4.4 (±0.7)        | 8484 (±247)               | 19(±2)            | 481 (±46)       |
| 1811   | 5665 (±44)        | 48.0 (±1.2)       | 6.3 (±0.6)        | 6641 (±234)               | 19(±2)            | 161 (±51)       |
| 1812   | 5640 (±52)        | 48.8 (±2.0)       | 5.4 (±0.9)        | 9175 (±96)                | 22(±3)            | 898 (±70)       |
| 1813   | 8093 (±69)        | 58.3 (±2.3)       | 5.3 (±1.2)        | 6888 (±315)               | 18(±3)            | 775 (±107)      |
| 1814   | 7125 (±56)        | 48.8 (±2.0)       | 5.1 (±1.1)        | 8327 (±117)               | 15(±3)            | 572 (±92)       |

**Table S3.** Activity of anthropogenic and natural radionuclides in cryoconite samples from Jotufonna (J), Vestre Grønfjordbreen (G) and Fridtjovbreen (F) glaciers, Svalbard (Bq kg<sup>-1</sup> d.m.).

| Sample | <sup>137</sup> Cs | <sup>241</sup> Am | <sup>207</sup> Bi | <sup>210</sup> Pb (total) | <sup>226</sup> Ra | <sup>7</sup> Be |
|--------|-------------------|-------------------|-------------------|---------------------------|-------------------|-----------------|
| J1701  | 17 (±1)           | <LD               | <LD               | 519 (±9)                  | 65 (±2)           | 30 (±8)         |
| J1702  | 289 (±3)          | 2.3 (±0.9)        | 0.7 (±0.3)        | 1132 (±29)                | 64 (±2)           | <LD             |
| J1703  | 531 (±4)          | 4.7 (±1.1)        | 0.7 (±0.2)        | 1176 (±37)                | 66 (±2)           | 74 (±12)        |
| J1704  | 1114 (±10)        | 8.4 (±1.3)        | 1.7 (±0.5)        | 2523 (±40)                | 58 (±3)           | 41 (±15)        |
| J1705  | 344 (±3)          | 2.8 (±1.0)        | 0.6 (±0.3)        | 2163 (±41)                | 59 (±2)           | 60 (±7)         |
| G1801  | 111 (±2)          | <LD               | <LD               | 2843 (±57)                | 51 (±2)           | 481 (±41)       |
| G1802  | 106 (±3)          | <LD               | <LD               | 3688 (±72)                | 45 (±2)           | 341 (±30)       |
| F1801  | 11 (±1)           | <LD               | <LD               | 1485 (±27)                | 55 (±1)           | 1720 (±32)      |
| F1802  | 496 (±5)          | 5.6 (±0.8)        | <LD               | 1965 (±51)                | 64 (±2)           | 499 (±32)       |
| F1803  | 1781 (±16)        | 24.0 (±1.4)       | 2.6 (±0.6)        | 4718 (±69)                | 49 (±2)           | 445 (±45)       |
| F1804  | 153 (±2)          | 1.2 (±1.1)        | <LD               | 1935 (±46)                | 65 (±1)           | <LD             |

**Table S4. Composition of the samples determined through XRF and ICP MS. Gross carbon contents were determined on a Vario EL elemental analyser. Please note that the unit is not the same for all the elements.**

| Sample #                          | 1701  | 1702  | 1703  | 1704  | 1705  | 1706  | 1707  | 1708  | 1709  | 1710  | 1711  | 1712  | 1713  | 1714  | 1801  | 1802  | 1803  | 1804  | 1805  | 1806  | 1807  | 1808  | 1809  | 1810  | 1811  | 1812  | 1813  | 1814  |
|-----------------------------------|-------|-------|-------|-------|-------|-------|-------|-------|-------|-------|-------|-------|-------|-------|-------|-------|-------|-------|-------|-------|-------|-------|-------|-------|-------|-------|-------|-------|
| Na <sub>2</sub> O%                | 0.78  | 0.84  | 0.97  | 0.85  | 0.84  | 0.85  | 0.84  | 1.05  | 1.04  | 0.92  | 1.04  | 1.03  | 1.07  | 1.05  | 0.77  | 0.83  | 0.96  | 0.93  | 0.91  | 0.92  | 0.89  | 0.92  | 0.88  | 0.89  | 0.88  | 0.88  | 0.86  | 0.87  |
| MgO%                              | 2.26  | 2.25  | 2.38  | 2.22  | 2.24  | 2.28  | 2.21  | 2.21  | 2.11  | 2.11  | 2.17  | 2.29  | 2.46  | 2.29  | 2.53  | 2.32  | 2.16  | 2.09  | 2.11  | 2.09  | 2.08  | 2.07  | 2.01  | 2.03  | 2.08  | 2.10  | 2.08  | 2.09  |
| Al <sub>2</sub> O <sub>3</sub> %  | 20.49 | 21.15 | 14.04 | 20.28 | 20.92 | 21.19 | 20.05 | 18.63 | 17.20 | 19.32 | 18.37 | 16.13 | 16.81 | 17.18 | 17.89 | 16.68 | 14.42 | 14.11 | 14.36 | 14.01 | 14.05 | 14.04 | 13.91 | 13.88 | 14.03 | 13.99 | 14.37 | 14.23 |
| K <sub>2</sub> O%                 | 3.29  | 3.51  | 2.82  | 3.44  | 3.62  | 3.69  | 3.43  | 3.47  | 3.19  | 3.33  | 3.32  | 2.78  | 3.04  | 3.16  | 3.39  | 3.08  | 2.67  | 2.66  | 2.67  | 2.64  | 2.67  | 2.67  | 2.70  | 2.71  | 2.69  | 2.65  | 2.67  | 2.69  |
| CaO%                              | 0.48  | 0.23  | 0.65  | 0.24  | 0.19  | 0.19  | 0.21  | 0.18  | 0.28  | 0.46  | 0.39  | 1.42  | 6.55  | 5.23  | 0.32  | 0.48  | 0.74  | 0.71  | 0.71  | 0.70  | 0.69  | 0.69  | 0.67  | 0.67  | 0.65  | 0.63  | 0.65  | 0.64  |
| TiO <sub>2</sub> %                | 1.20  | 1.19  | 0.94  | 1.14  | 1.22  | 1.20  | 1.14  | 1.05  | 1.01  | 1.27  | 1.07  | 0.93  | 0.92  | 0.98  | 1.13  | 1.26  | 1.26  | 1.26  | 1.24  | 1.24  | 1.26  | 1.25  | 1.25  | 1.26  | 1.24  | 1.22  | 1.24  | 1.23  |
| Fe <sub>2</sub> O <sub>3</sub> %* | 8.08  | 7.72  | 5.50  | 7.52  | 7.53  | 7.53  | 7.61  | 7.75  | 7.81  | 7.48  | 7.74  | 7.54  | 6.80  | 7.06  | 9.07  | 9.58  | 8.85  | 8.85  | 8.93  | 8.72  | 8.66  | 8.95  | 8.92  | 8.91  | 8.60  | 8.69  | 8.82  | 8.95  |
| P <sub>2</sub> O <sub>5</sub> %*  | 0.11  | 0.10  | 0.18  | 0.10  | 0.10  | 0.09  | 0.10  | 0.10  | 0.11  | 0.14  | 0.10  | 0.11  | 0.10  | 0.10  | 0.08  | 0.13  | 0.21  | 0.21  | 0.21  | 0.21  | 0.20  | 0.21  | 0.21  | 0.22  | 0.21  | 0.21  | 0.24  | 0.24  |
| S%*                               | 0.05  | 0.03  | 0.11  | 0.04  | 0.03  | 0.03  | 0.04  | 0.03  | 0.07  | 0.10  | 0.04  | 0.06  | 0.08  | 0.07  | 0.03  | 0.12  | 0.22  | 0.26  | 0.25  | 0.23  | 0.25  | 0.25  | 0.27  | 0.27  | 0.24  | 0.23  | 0.24  | 0.25  |
| C%*                               | 2.07  | 2.87  | 3.71  | 3.78  | 4.02  | 3.42  | 3.73  | 2.77  | 3.30  | 10.16 | 2.71  | 2.07  | 2.87  | 3.56  | 5.25  | 10.34 | 15.75 | 16.72 | 16.14 | 15.78 | 16.66 | 17.14 | 17.04 | 17.44 | 15.61 | 14.64 | 15.70 | 13.83 |
| Be                                | 2.31  | 2.45  | 2.54  | 2.37  | 2.39  | 2.41  | 2.32  | 2.47  | 2.37  | 1.85  | 2.35  | 2.12  | 2.05  | 2.07  | 2.41  | 1.85  | 1.31  | 1.26  | 1.32  | 1.29  | 1.17  | 1.36  | 1.26  | 1.32  | 1.38  | 1.32  | 1.42  | 1.44  |
| Sc                                | 18.2  | 15.7  | 18.1  | 20.1  | 20.4  | 20.5  | 18.8  | 19.3  | 16.6  | 17.7  | 19.0  | 17.4  | 14.9  | 16.7  | 18.6  | 17.5  | 14.2  | 12.9  | 13.4  | 13.6  | 12.8  | 13.1  | 13.0  | 13.1  | 13.3  | 13.6  | 12.9  | 13.6  |
| V                                 | 136.4 | 138.2 | 140.6 | 115.8 | 135.6 | 121.4 | 118.1 | 145.5 | 130.5 | 125.9 | 134.4 | 120.4 | 122.2 | 123.2 | 138.3 | 132.1 | 109.8 | 91.7  | 99.2  | 102.9 | 92.7  | 102.8 | 95.2  | 99.0  | 100.1 | 79.1  | 96.0  | 100.6 |
| Co                                | 21.9  | 17.7  | 16.4  | 16.5  | 16.5  | 16.8  | 17.0  | 16.9  | 16.3  | 13.3  | 16.4  | 17.6  | 16.9  | 16.3  | 15.9  | 14.2  | 10.9  | 9.9   | 10.6  | 10.1  | 9.2   | 10.2  | 9.8   | 10.0  | 10.2  | 10.1  | 10.5  | 11.1  |
| Cu                                | 30.7  | 31.0  | 28.9  | 27.5  | 29.5  | 28.4  | 28.4  | 27.7  | 27.1  | 31.5  | 27.4  | 25.3  | 24.7  | 25.9  | 28.0  | 32.0  | 35.4  | 34.4  | 37.5  | 38.0  | 36.1  | 41.4  | 38.4  | 40.0  | 43.6  | 40.9  | 49.3  | 53.5  |
| Ga                                | 22.4  | 23.1  | 23.5  | 22.5  | 23.0  | 24.0  | 22.5  | 23.2  | 21.9  | 20.5  | 22.0  | 20.3  | 18.7  | 20.3  | 22.8  | 19.7  | 16.9  | 16.0  | 17.6  | 17.6  | 16.7  | 18.1  | 16.8  | 17.4  | 19.6  | 18.9  | 20.1  | 20.5  |
| Se                                | 2.51  | 2.79  | 2.78  | 2.98  | 2.70  | 2.69  | 2.55  | 2.69  | 2.72  | 3.64  | 2.57  | 2.45  | 2.36  | 2.41  | 3.12  | 3.27  | 5.23  | 5.03  | 4.73  | 4.32  | 4.20  | 3.90  | 4.31  | 4.29  | 3.79  | 3.50  | 3.79  | 4.44  |
| Rb                                | 142   | 152   | 151   | 149   | 156   | 163   | 145   | 151   | 139   | 121   | 149   | 124   | 128   | 138   | 151   | 117   | 80.9  | 75.1  | 78.2  | 80.4  | 75.3  | 78.6  | 76.6  | 79.2  | 82.1  | 82.8  | 79.2  | 81.4  |
| Sr                                | 175   | 177   | 177   | 171   | 179   | 189   | 170   | 181   | 151   | 141   | 179   | 147   | 226   | 242   | 179   | 155   | 96.4  | 88.2  | 93.5  | 92.5  | 86.4  | 90.7  | 86.5  | 88.0  | 94.1  | 91.5  | 91.5  | 93.4  |
| Y                                 | 39.6  | 34.3  | 35.2  | 36.6  | 34.8  | 34.3  | 36.9  | 35.9  | 36.5  | 30.4  | 35.1  | 38.3  | 32.1  | 32.8  | 32.7  | 33.7  | 23.7  | 21.8  | 22.8  | 22.1  | 19.9  | 20.5  | 20.2  | 20.3  | 21.2  | 22.0  | 21.4  | 21.4  |
| Zr                                | 225   | 198   | 183   | 179   | 175   | 183   | 186   | 181   | 186   | 184   | 185   | 188   | 160   | 166   | 176   | 195   | 169   | 144   | 156   | 146   | 136   | 142   | 138   | 145   | 150   | 150   | 146   | 151   |
| Nb                                | 17.3  | 17.0  | 16.4  | 16.2  | 17.1  | 17.3  | 16.4  | 16.4  | 15.3  | 15.9  | 15.9  | 14.5  | 13.1  | 14.4  | 15.8  | 15.5  | 13.3  | 12.7  | 12.9  | 12.9  | 12.1  | 12.9  | 12.4  | 12.5  | 13.2  | 13.0  | 12.7  | 13.4  |
| Mo                                | 2.00  | 2.14  | 2.01  | 1.82  | 2.20  | 2.08  | 1.92  | 1.80  | 2.17  | 2.48  | 1.79  | 1.71  | 2.62  | 1.66  | 2.20  | 2.66  | 3.01  | 2.80  | 3.02  | 3.47  | 2.74  | 3.24  | 2.81  | 4.94  | 3.06  | 2.72  | 2.99  | 3.12  |
| Ag                                | 0.15  | 0.18  | 0.14  | 0.16  | 0.16  | 0.14  | 0.16  | 0.11  | 0.14  | 0.39  | 0.12  | 0.11  | 0.09  | 0.11  | 0.16  | 0.29  | 0.57  | 0.64  | 0.74  | 0.75  | 0.75  | 0.77  | 0.73  | 0.76  | 0.88  | 0.91  | 1.4   | 1.5   |
| Cd                                | 0.13  | 0.15  | 0.08  | 0.07  | 0.06  | 0.06  | 0.07  | 0.06  | 0.09  | 0.10  | 0.05  | 0.12  | 0.14  | 0.04  | <0.04 | 0.10  | 0.18  | 0.21  | 0.27  | 0.20  | 0.20  | 0.24  | 0.21  | 0.23  | 0.23  | 0.22  | 0.32  | 0.38  |
| Sn                                | 3.9   | 4.5   | 4.5   | 4.2   | 4.5   | 4.1   | 4.1   | 4.2   | 4.3   | 7.8   | 4.1   | 3.4   | 3.6   | 3.9   | 4.3   | 5.9   | 9.9   | 10.5  | 12.4  | 12.6  | 12.7  | 17.3  | 13.0  | 14.3  | 18.0  | 17.3  | 26.6  | 28.1  |
| Sb                                | 1.91  | 1.91  | 1.86  | 1.80  | 1.89  | 1.89  | 1.81  | 1.72  | 1.90  | 2.68  | 1.70  | 1.81  | 1.73  | 1.75  | 2.04  | 2.38  | 3.44  | 3.43  | 3.90  | 3.80  | 3.80  | 4.17  | 3.94  | 4.08  | 5.19  | 4.79  | 6.06  | 6.16  |
| Cs                                | 6.93  | 7.46  | 7.59  | 7.40  | 7.75  | 7.99  | 7.28  | 7.66  | 6.79  | 6.82  | 7.26  | 5.87  | 6.01  | 6.71  | 7.49  | 6.43  | 5.28  | 4.90  | 5.21  | 5.37  | 5.18  | 5.44  | 5.26  | 5.33  | 5.72  | 5.56  | 5.63  | 5.80  |
| Ba                                | 425   | 457   | 460   | 453   | 471   | 479   | 455   | 468   | 431   | 421   | 442   | 371   | 389   | 402   | 474   | 404   | 344   | 320   | 337   | 339   | 322   | 340   | 326   | 332   | 350   | 345   | 341   | 350   |
| La                                | 45.9  | 36.4  | 35.3  | 36.4  | 36.9  | 35.0  | 36.4  | 36.3  | 36.7  | 35.4  | 35.4  | 37.6  | 34.1  | 33.9  | 33.5  | 34.3  | 29.7  | 25.6  | 27.4  | 27.1  | 25.6  | 25.6  | 25.6  | 25.7  | 26.2  | 27.3  | 25.3  | 28.2  |
| Ce                                | 96.0  | 75.8  | 73.1  | 75.1  | 76.9  | 72.7  | 75.5  | 75.5  | 75.9  | 72.6  | 73.2  | 78.5  | 71.3  | 70.7  | 69.6  | 70.5  | 61.8  | 52.2  | 57.3  | 56.0  | 53.4  | 53.7  | 52.8  | 53.5  | 55.9  | 56.8  | 53.2  | 57.6  |
| Pr                                | 11.4  | 9.3   | 8.8   | 9.0   | 9.1   | 8.7   | 9.0   | 9.0   | 9.1   | 8.4   | 8.8   | 9.4   | 8.6   | 8.4   | 8.2   | 8.3   | 7.1   | 5.9   | 6.5   | 6.4   | 6.0   | 6.0   | 6.0   | 6.0   | 6.3   | 6.3   | 6.0   | 6.5   |
| Nd                                | 44.9  | 36.2  | 34.4  | 35.7  | 36.1  | 34.2  | 35.7  | 35.5  | 35.4  | 33.3  | 34.5  | 36.8  | 34.3  | 33.2  | 32.1  | 32.7  | 27.7  | 23.1  | 25.2  | 24.7  | 23.3  | 22.8  | 23.2  | 23.1  | 24.1  | 24.7  | 22.7  | 24.7  |
| Sm                                | 8.86  | 7.16  | 6.93  | 6.95  | 7.02  | 6.81  | 7.02  | 6.97  | 7.03  | 6.29  | 6.78  | 7.40  | 6.88  | 6.61  | 6.35  | 6.27  | 5.26  | 4.34  | 4.78  | 4.58  | 4.32  | 4.40  | 4.37  | 4.33  | 4.72  | 4.65  | 4.42  | 4.70  |
| Eu                                | 1.71  | 1.36  | 1.32  | 1.37  | 1.36  | 1.32  | 1.36  | 1.34  | 1.38  | 1.25  | 1.32  | 1.46  | 1.34  | 1.28  | 1.23  | 1.25  | 1.06  | 0.91  | 0.97  | 0.94  | 0.87  | 0.92  | 0.91  | 0.88  | 0.96  | 0.94  | 0.89  | 0.94  |
| Gd                                | 7.18  | 5.76  | 5.59  | 5.87  | 5.69  | 5.50  | 5.85  | 5.89  | 5.88  | 5.05  | 5.68  | 6.17  | 5.70  | 5.48  | 5.24  | 5.13  | 4.10  | 3.56  | 3.74  | 3.65  | 3.40  | 3.40  | 3.37  | 3.47  | 3.58  | 3.71  | 3.33  | 3.63  |
| Tb                                | 1.17  | 0.97  | 0.95  | 0.99  | 0.96  | 0.92  | 1.00  | 1.00  | 1.00  | 0.84  | 0.96  | 1.04  | 0.94  | 0.91  | 0.89  | 0.88  | 0.66  | 0.59  | 0.63  | 0.60  | 0.55  | 0.54  | 0.57  | 0.57  | 0.58  | 0.61  | 0.57  | 0.60  |
| Dy                                | 7.22  | 6.31  | 5.93  | 6.51  | 6.25  | 5.69  | 6.46  | 6.28  | 6.14  | 5.37  | 6.30  | 6.53  | 5.89  | 5.81  | 5.38  | 5.70  | 4.19  | 3.72  | 3.70  | 3.88  | 3.51  | 3.40  | 3.60  | 3.63  | 3.53  | 3.85  | 3.46  | 3.77  |
| Ho                                | 1.46  | 1.30  | 1.27  | 1.31  | 1.24  | 1.21  | 1.32  | 1.28  | 1.30  | 1.10  | 1.29  | 1.39  | 1.18  | 1.19  | 1.14  | 1.18  | 0.83  | 0.77  | 0.82  | 0.80  | 0.71  | 0.73  | 0.73  | 0.74  | 0.76  | 0.77  | 0.75  | 0.75  |
| Er                                | 4.51  | 3.98  | 3.88  | 4.11  | 3.91  | 3.81  | 4.17  | 3.98  | 4.03  | 3.40  | 3.98  | 4.20  | 3.71  | 3.67  | 3.59  | 3.68  | 2.63  | 2.41  | 2.51  | 2.46  | 2.22  | 2.30  | 2.29  | 2.30  | 2.43  | 2.40  | 2.38  | 2.36  |
| Tm                                | 0.63  | 0.55  | 0.52  | 0.56  | 0.55  | 0.53  | 0.57  | 0.55  | 0.54  | 0.47  | 0.54  | 0.56  | 0.50  | 0.51  | 0.47  | 0.52  | 0.36  | 0.33  | 0.34  | 0.34  |       |       |       |       |       |       |       |       |

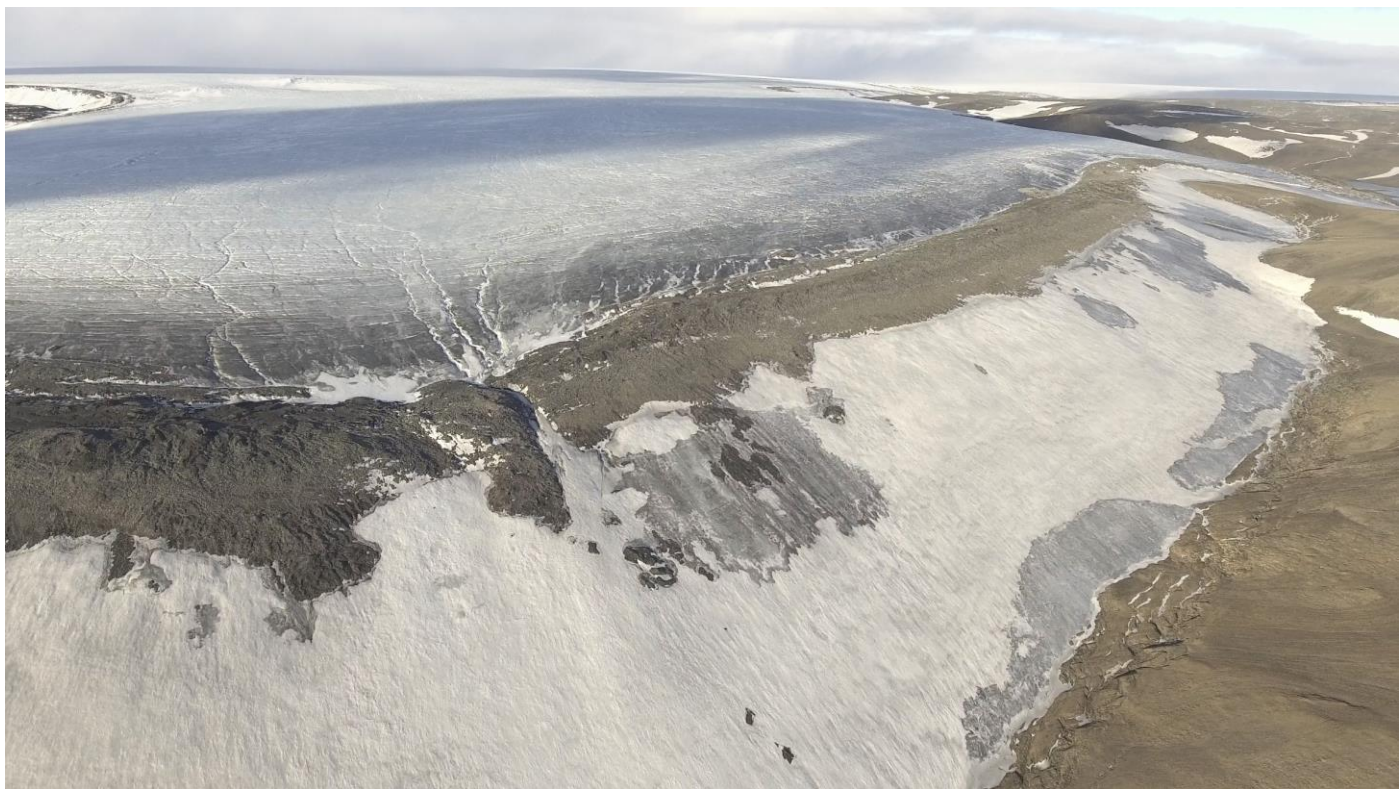

**Figure S1.** Nalli Glacier as seen from  $\sim 170$  m elevation. Photo by Evgeniy Bogatov with permission under a CC BY open access license.

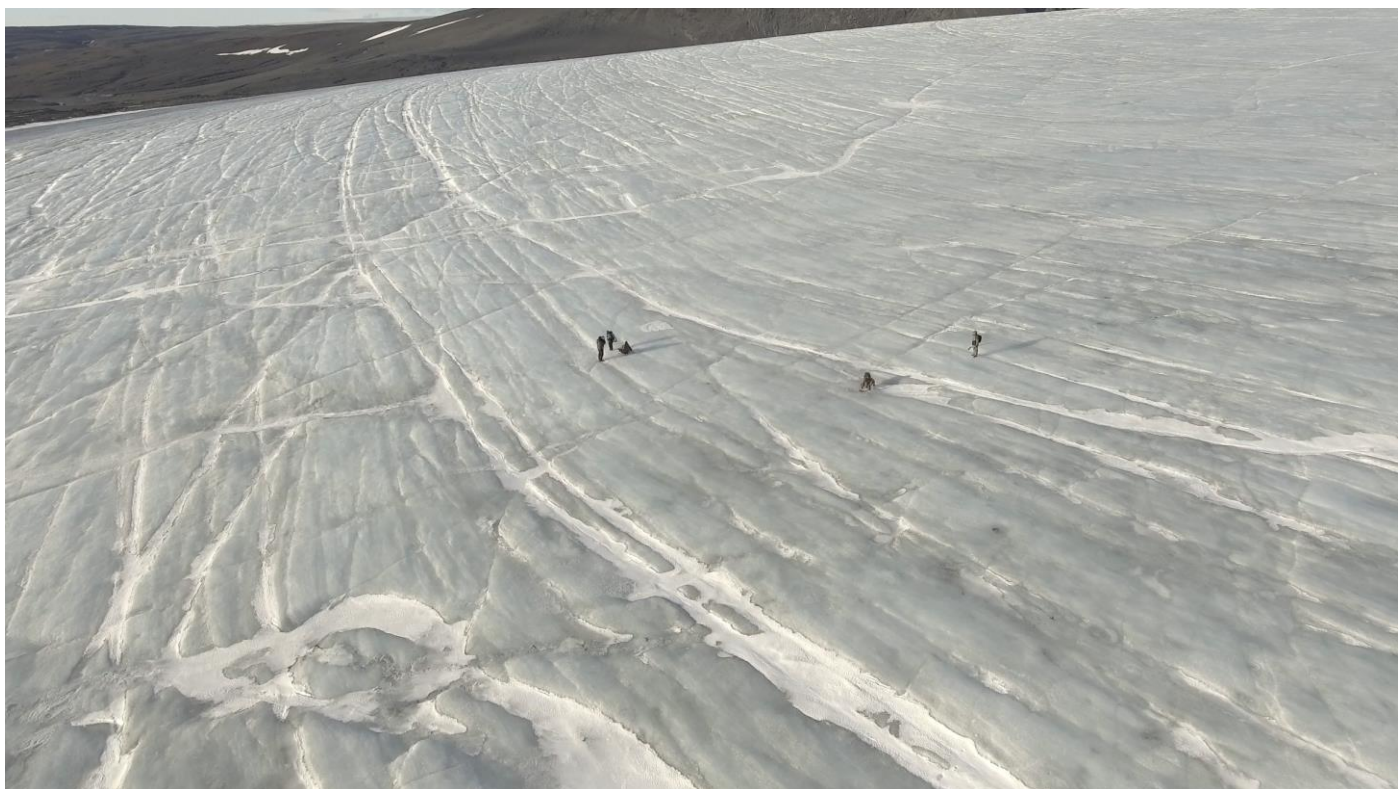

**Figure S2.** Nalli Glacier as seen from  $\sim 100$  m elevation. Photo by Evgeniy Bogatov with permission under a CC BY open access license.

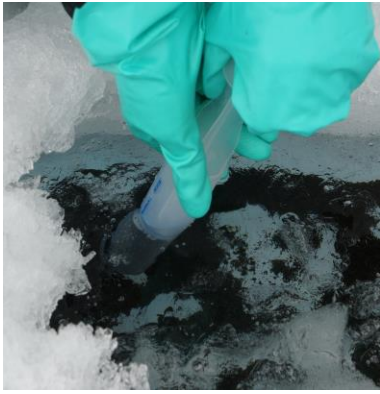

a

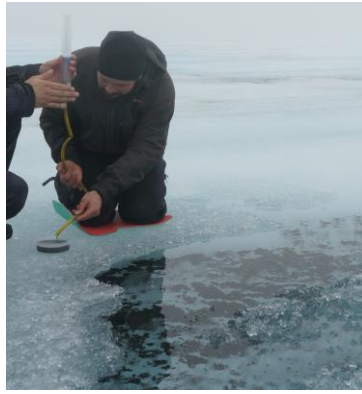

b

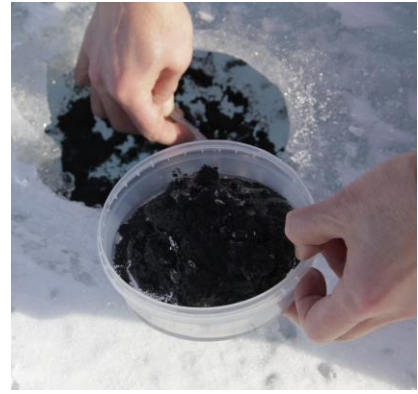

c

**Figure S3.** Collection of sediments from cryoconite holes using Janet's syringe (a and b) or a plastic spoon (c). Photo by Evgeniy Bogatov with permission under a CC BY open access license.
